# Supplementary material
Source: PubMed Central journal article supplement (PMC8115144)
Supplement: 41423_2020_521_MOESM1_ESM.pdf [file 41423_2020_521_MOESM1_ESM.pdf]

## Supplementary figures

### **Primed macrophages gain the long term specific memory to reject allogeneic tissues in mice**

Zhulang Chu<sup>1,2,\*</sup>, Chang Feng<sup>1,3,\*</sup>, Chenming Sun<sup>1,\*</sup>, Yanan Xu<sup>1,3</sup>, Yong Zhao<sup>1,3,4,#</sup>

<sup>1</sup> State Key Laboratory of Membrane Biology, Institute of Zoology, Chinese Academy of Sciences, Beijing 100101, China; <sup>2</sup> Department of Pathology, School of Traditional Chinese Medicine, Beijing University of Chinese Medicine, Beijing, China; <sup>3</sup> University of Chinese Academy of Sciences, Beijing, China; <sup>4</sup> Institute for Stem Cell and Regeneration, Chinese Academy of Sciences, Beijing 100101, China.

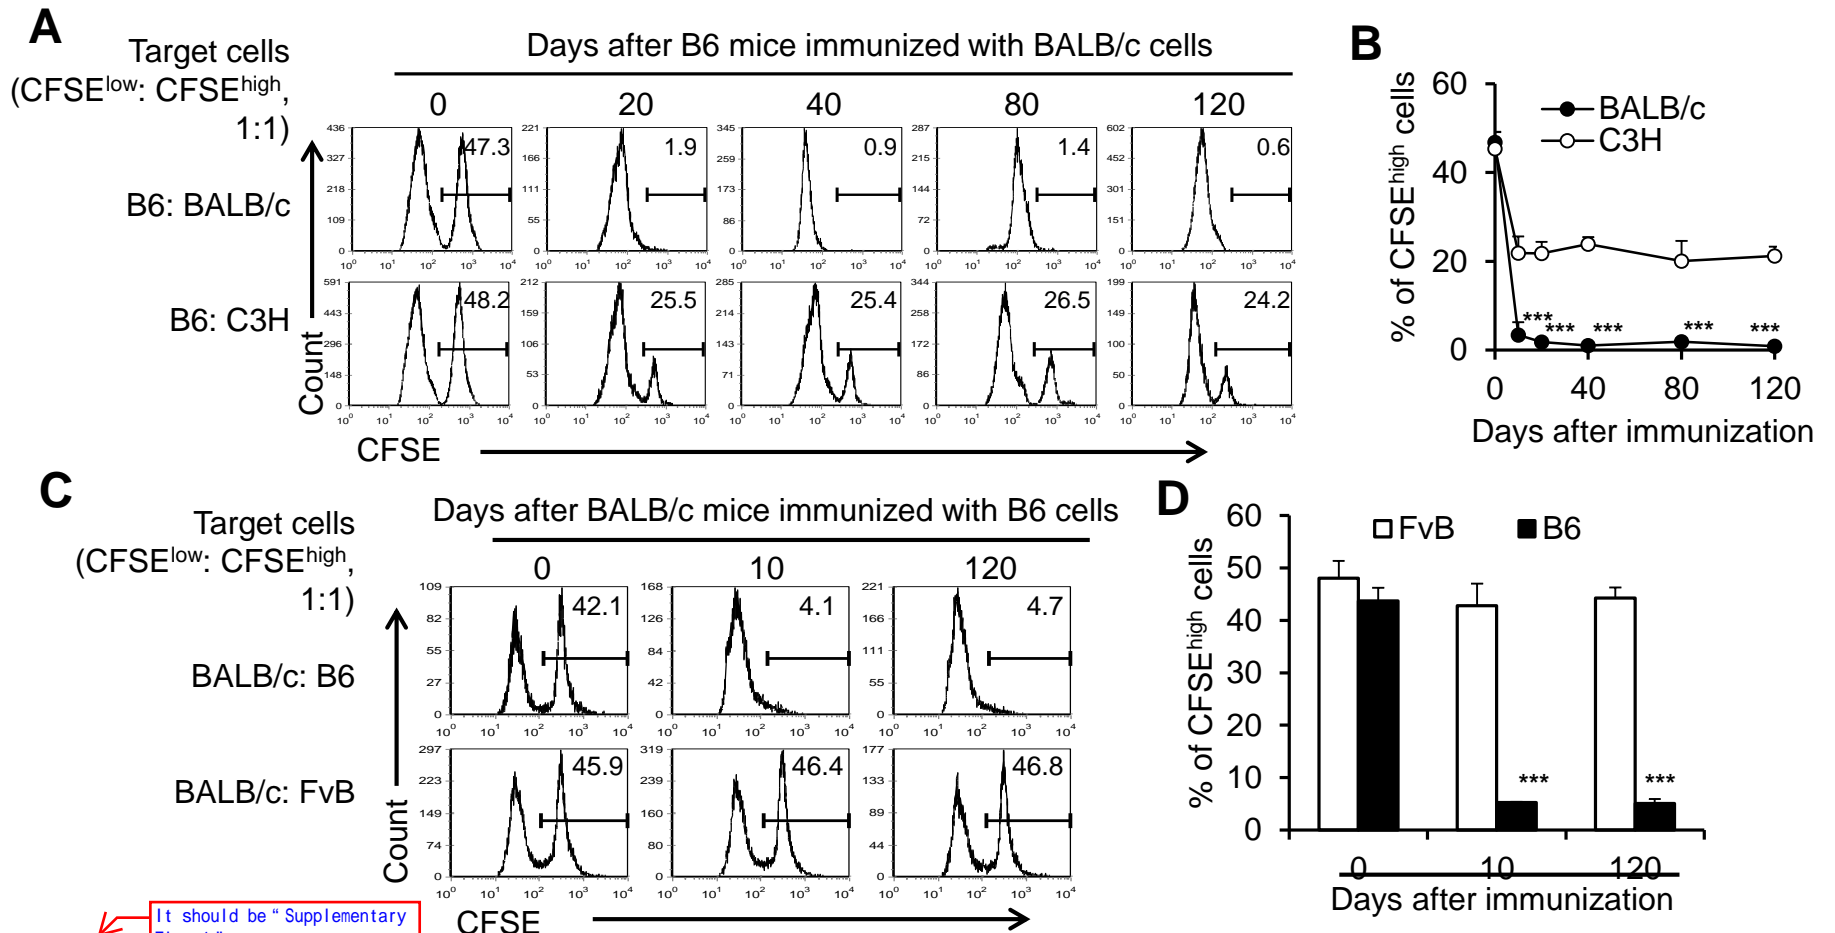

It should be "Supplementary Fig. 1"

**Figure 3. Primed mice rejected allogeneic splenocytes with memory**

B6 mice were immunized with BALB/c splenocytes. At various days (0, 20, 40, 80, 120 days) after immunization, CFSE-labeled B6 (CFSE<sup>low</sup> cells) and BALB/c or C3H (CFSE<sup>high</sup> cells) splenocytes were mixed at a 1:1 ratio and intraperitoneally injected into naïve B6 mice (day 0) or BALB/c splenocytes-primed B6 mice. The survival of CFSE-labeled target splenocytes (CFSE<sup>low</sup> B6 cells: CFSE<sup>high</sup> BALB/c cells or CFSE<sup>low</sup> B6 cells: CFSE<sup>high</sup> C3H cells = 1: 1) cells (**A**) and the average percentages of CFSE<sup>high</sup> BALB/c cells or C3H cells in total CFSE-labeled cells (**B**) in B6 mice immunized with BALB/c splenocytes for the indicated days was determined by flow cytometry by 24 h after detecting target cell injection. BALB/c mice were immunized with B6 splenocytes. CFSE-labeled BALB/c (CFSE<sup>low</sup> cells) and B6 or FvB (CFSE<sup>low</sup> cells) spleen cells were mixed at a 1:1 ratio and intraperitoneally injected into naïve BALB/c mice (day 0) or B6 splenocytes-primed BALB/c mice which were immunized with B6 splenocytes 10 or 120 days ago. The survival of CFSE-labeled cells (**C**) and the summarized percentages of CFSE<sup>high</sup> FvB cells or B6 cells in total CFSE-labeled cells (**D**) in host BALB/c mice was determined by flow cytometry within 24 h after injection. \*\*\**P*<0.001 compared with the indicated groups.
